# Supplementary material for: Pressure-induced thermoelectric properties of strongly reduced titanium oxides
Source: Royal Society of Chemistry journal article supplement (doi:10.1039/c8ce02022a), 2019-01-01
Supplement: c8ce02022a1.pdf [file c8ce02022a1.pdf]

## Supporting Information

Pressure-induced thermoelectric properties of strongly reduced titanium oxides

Haiqiang Liu,<sup>a</sup> Hongan Ma,<sup>\*a</sup> Lixue Chen,<sup>a</sup> Fei Wang,<sup>a</sup> Baomin Liu,<sup>a</sup> Jiaxiang Chen,<sup>a</sup>  
Guangyao Ji,<sup>a</sup> Yuewen Zhang<sup>\*b</sup> and Xiaopeng Jia<sup>\*a</sup>

a. State Key Laboratory of Superhard Materials, College of Physics, Jilin University, Changchun 130012, China.

b. Key Laboratory of Material Physics of Ministry of Education, School of Physics and Engineering, Zhengzhou University, Zhengzhou 450052, China.

\*Corresponding author. E-mail address: maha@jlu.edu.cn; zhangyw@zzu.edu.cn; jiexp@jlu.edu.cn.

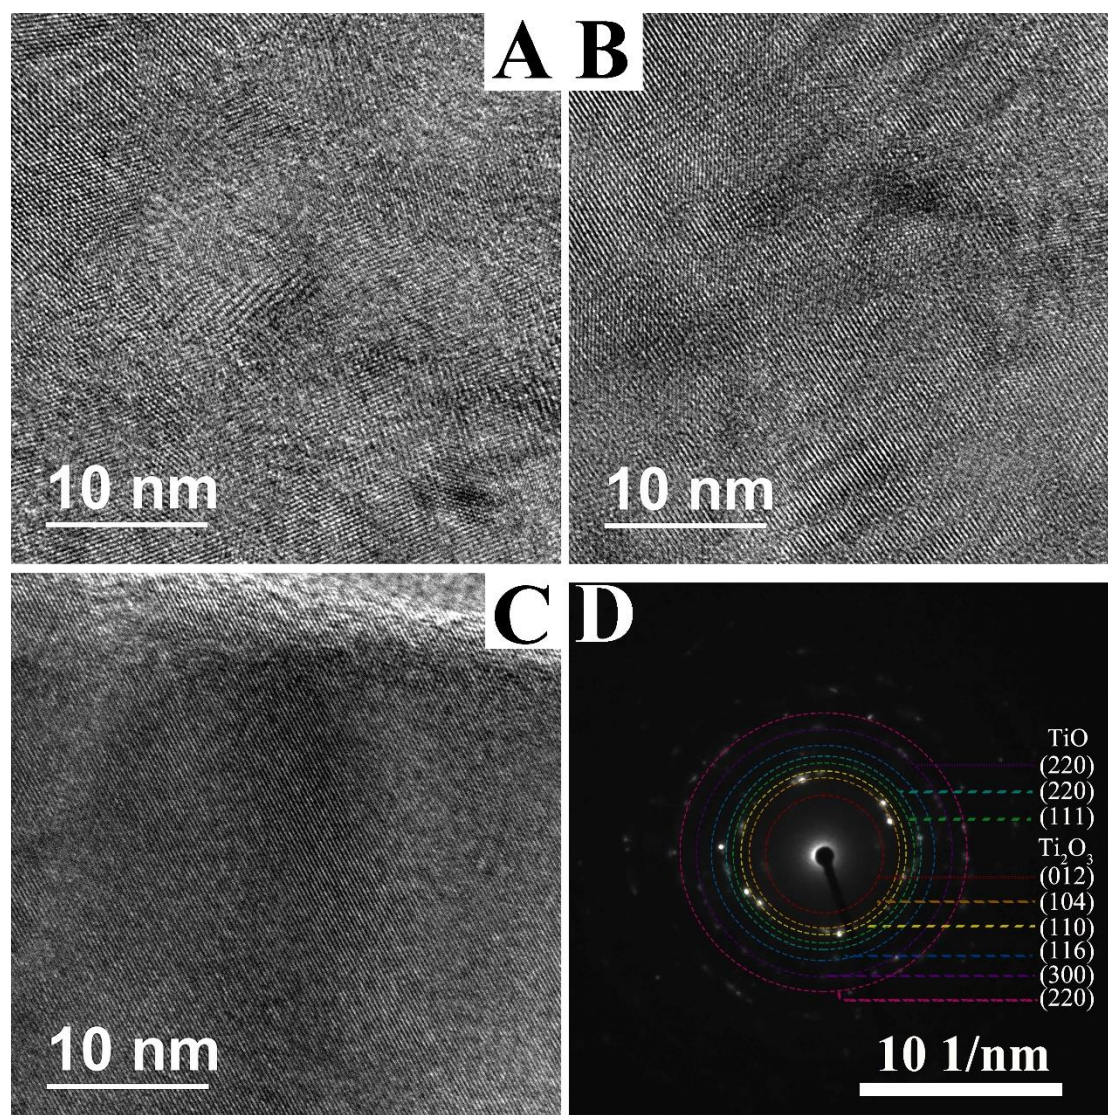

Figure S1. The version without marks for TEM images.
